# Supplementary material for: Differential Evolution approach to detect recent admixture
Source: PubMed Central journal article supplement (PMC4480842; doi:10.1186/1471-2164-16-s8-s9), 2015-06-18
Supplement: 1471-2164-16-S8-S9-S1.pdf [file 1471-2164-16-S8-S9-S1.pdf]

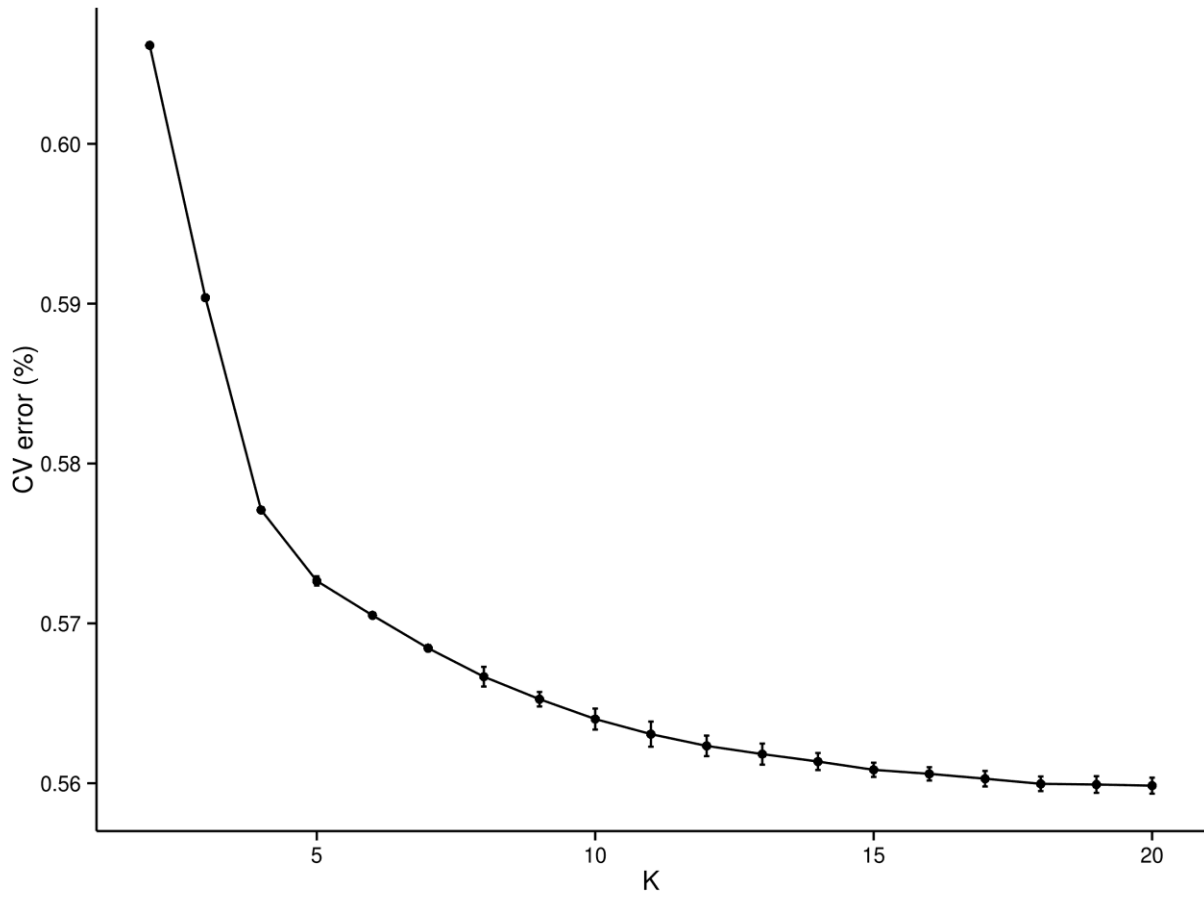

Supplementary Figure 1: Selection of the optimal number of admixture components, ten-fold cross-validation (CV), K=2..20.
